# Supplementary material
Source: PubMed Central journal article supplement (PMC4084449)
Supplement: 1409229111_pnas.201409229SI.pdf [file 1409229111_pnas.201409229SI.pdf]

# Supporting Information

Szendroedi et al. 10.1073/pnas.1409229111

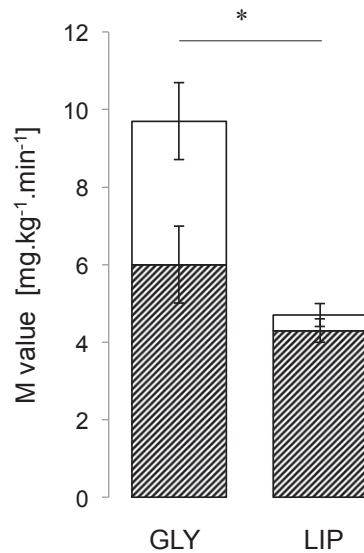

**Fig. S1.** Whole-body glucose disposal in lean healthy young humans after 4 h glycerol (GLY) or lipid (LIP) infusion ( $n = 23$ ), glucose oxidation (striped), and lipid oxidation (plane). M value was reduced during lipid infusion ( $P < 10 \cdot 10^{-7}$ ). Data are given as means  $\pm$  SEM.

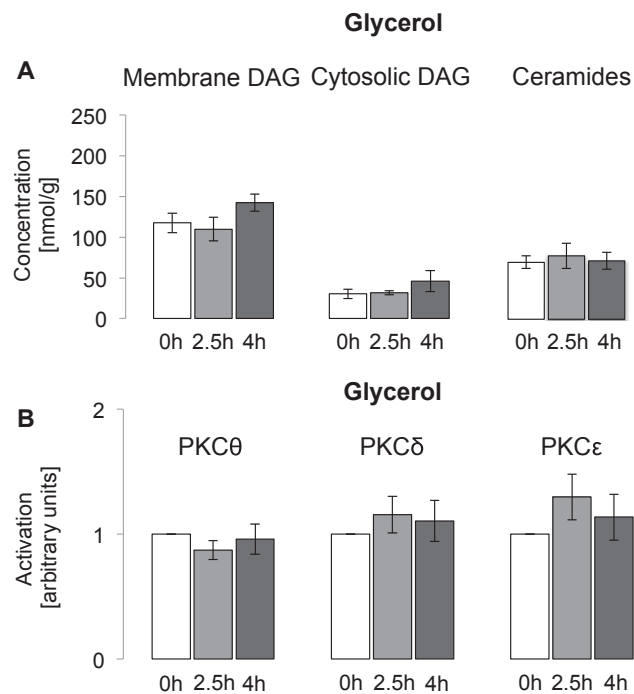

**Fig. S2.** (A) Myocellular diacylglycerol (DAG) concentrations in the membrane and cytosolic fraction and ceramide concentrations during glycerol infusion in young lean healthy controls (CON) ( $n = 10$ ). Myocellular ceramides did not change during lipid infusion. (B) Activation of myocellular PKC $\theta$ , PKC $\delta$ , and PKC $\epsilon$  during glycerol infusion in young lean healthy controls ( $n = 10-14$ ). Data are given as means  $\pm$  SEM.





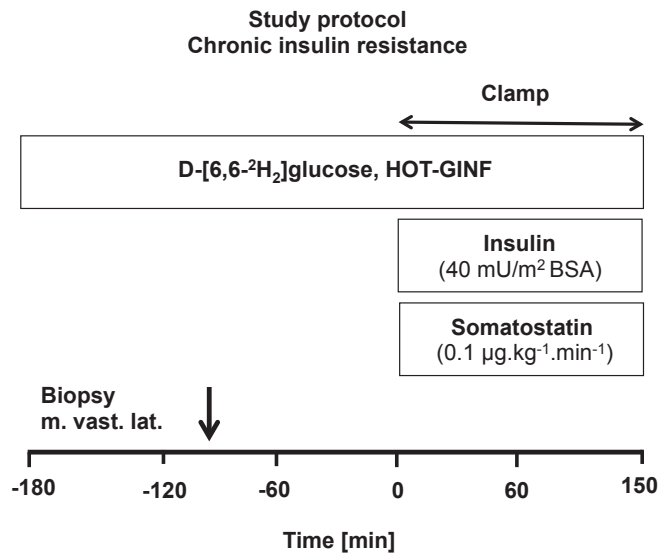

Fig. S7. Study protocol for common insulin resistance.

**Table S1. Myocellular DAG species in short-term and common insulin resistance**

| Study group and condition | C18:1, C16:0 |       | C20:4, C20:5 |       | C16:0, C20:4 |       | C18:0, C20:4 |      | C18:0, C18:0 |      | C18:2, C18:0 |      | C18:1, C18:0 |      |      |      |      |      |      |      |      |
|---------------------------|--------------|-------|--------------|-------|--------------|-------|--------------|------|--------------|------|--------------|------|--------------|------|------|------|------|------|------|------|------|
|                           | Basal        | 4 h   | Basal        | 4 h   | Basal        | 4 h   | Basal        | 4 h  | Basal        | 4 h  | Basal        | 4 h  | Basal        | 4 h  |      |      |      |      |      |      |      |
| <b>CON</b>                |              |       |              |       |              |       |              |      |              |      |              |      |              |      |      |      |      |      |      |      |      |
| Glycerol                  |              |       |              |       |              |       |              |      |              |      |              |      |              |      |      |      |      |      |      |      |      |
| Cytosol, nmol/g           |              |       |              |       |              |       |              |      |              |      |              |      |              |      |      |      |      |      |      |      |      |
| Mean                      | 2.67         | 3.21  | 3.71         | 1.04  | 0.85         | 1.06  | 0.31         | 0.29 | 0.41         | 0.35 | 0.31         | 0.43 | 3.76         | 3.73 | 5.81 | 0.77 | 0.81 | 1.04 | 2.98 | 3.00 | 4.41 |
| SD                        | 0.99         | 0.74  | 3.04         | 0.33  | 0.19         | 0.55  | 0.17         | 0.05 | 0.36         | 0.17 | 0.05         | 0.34 | 2.72         | 1.28 | 6.59 | 0.37 | 0.17 | 0.85 | 2.13 | 0.86 | 4.38 |
| Membrane, nmol/g          |              |       |              |       |              |       |              |      |              |      |              |      |              |      |      |      |      |      |      |      |      |
| Mean                      | 11.64        | 12.82 | 15.56        | 11.49 | 8.77         | 13.98 | 0.48         | 0.46 | 0.69         | 1.73 | 1.45         | 2.24 | 3.78         | 4.24 | 6.11 | 2.62 | 2.72 | 3.42 | 4.38 | 4.74 | 6.32 |
| SD                        | 3.18         | 4.30  | 4.28         | 5.34  | 1.78         | 2.42  | 0.20         | 0.11 | 0.31         | 0.64 | 0.19         | 0.23 | 1.83         | 0.93 | 3.09 | 0.58 | 0.62 | 0.81 | 1.70 | 1.26 | 2.19 |
| Lipid                     |              |       |              |       |              |       |              |      |              |      |              |      |              |      |      |      |      |      |      |      |      |
| Cytosol, nmol/g           |              |       |              |       |              |       |              |      |              |      |              |      |              |      |      |      |      |      |      |      |      |
| Mean                      | 3.15         | 8.24  | 3.96         | 1.44  | 1.59         | 1.64  | 0.07         | 0.11 | 0.11         | 0.12 | 0.14         | 0.12 | 5.17         | 5.92 | 4.24 | 0.37 | 0.74 | 0.45 | 1.32 | 3.47 | 1.48 |
| SD                        | 1.27         | 5.59  | 1.90         | 0.74  | 1.12         | 1.14  | 0.04         | 0.04 | 0.06         | 0.06 | 0.06         | 0.04 | 4.29         | 5.18 | 2.17 | 0.18 | 0.27 | 0.32 | 1.39 | 3.78 | 1.16 |
| Membrane, nmol/g          |              |       |              |       |              |       |              |      |              |      |              |      |              |      |      |      |      |      |      |      |      |
| Mean                      | 14.48        | 27.64 | 19.70        | 15.74 | 20.07        | 17.78 | 0.18         | 0.35 | 0.29         | 0.78 | 1.16         | 0.94 | 5.55         | 6.98 | 6.66 | 1.75 | 3.34 | 2.60 | 3.48 | 6.37 | 4.91 |
| SD                        | 6.46         | 18.19 | 17.63        | 7.48  | 12.86        | 7.65  | 0.08         | 0.11 | 0.17         | 0.38 | 0.31         | 0.49 | 1.83         | 3.37 | 2.02 | 0.78 | 1.05 | 1.27 | 1.41 | 2.68 | 3.77 |
| <b>OBE</b>                |              |       |              |       |              |       |              |      |              |      |              |      |              |      |      |      |      |      |      |      |      |
| Cytosol, nmol/g           |              |       |              |       |              |       |              |      |              |      |              |      |              |      |      |      |      |      |      |      |      |
| Mean                      | 7.21         |       |              | 1.15  |              |       | 0.12         |      |              | 0.21 |              |      | 8.18         |      |      | 0.70 |      |      | 5.76 |      |      |
| SD                        | 1.38         |       |              | 0.44  |              |       | 0.04         |      |              | 0.05 |              |      | 5.61         |      |      | 0.28 |      |      | 3.76 |      |      |
| Membrane, nmol/g          |              |       |              |       |              |       |              |      |              |      |              |      |              |      |      |      |      |      |      |      |      |
| Mean                      | 15.66        |       |              | 9.01  |              |       | 0.24         |      |              | 1.12 |              |      | 8.86         |      |      | 2.12 |      |      | 6.85 |      |      |
| SD                        | 3.51         |       |              | 3.84  |              |       | 0.07         |      |              | 0.41 |              |      | 4.57         |      |      | 0.80 |      |      | 2.71 |      |      |
| <b>T2D</b>                |              |       |              |       |              |       |              |      |              |      |              |      |              |      |      |      |      |      |      |      |      |
| Cytosol, nmol/g           |              |       |              |       |              |       |              |      |              |      |              |      |              |      |      |      |      |      |      |      |      |
| Mean                      | 9.35         |       |              | 1.51  |              |       | 0.15         |      |              | 0.29 |              |      | 11.41        |      |      | 1.04 |      |      | 7.40 |      |      |
| SD                        | 7.13         |       |              | 0.67  |              |       | 0.07         |      |              | 0.16 |              |      | 14.01        |      |      | 0.65 |      |      | 6.06 |      |      |
| Membrane, nmol/g          |              |       |              |       |              |       |              |      |              |      |              |      |              |      |      |      |      |      |      |      |      |
| Mean                      | 20.68        |       |              | 11.78 |              |       | 0.30         |      |              | 1.67 |              |      | 10.41        |      |      | 3.28 |      |      | 9.65 |      |      |
| SD                        | 8.15         |       |              | 5.15  |              |       | 0.10         |      |              | 0.90 |              |      | 7.98         |      |      | 1.56 |      |      | 6.84 |      |      |

Table S2. Myocellular DAG species in short-term and common insulin resistance

|                  | C16:0, C16:0 |       |      | C18:0, C16:0 |       |      | C18:1, C18:1 |       |       | C18:1, C18:2 |       |       | C18:2, C18:2 |       |       | C16:0, C18:2 |       |       |
|------------------|--------------|-------|------|--------------|-------|------|--------------|-------|-------|--------------|-------|-------|--------------|-------|-------|--------------|-------|-------|
|                  | Basal        | 2.5 h | 4 h  | Basal        | 2.5 h | 4 h  | Basal        | 2.5 h | 4 h   | Basal        | 2.5 h | 4 h   | Basal        | 2.5 h | 4 h   | Basal        | 2.5 h | 4 h   |
| <b>CON</b>       |              |       |      |              |       |      |              |       |       |              |       |       |              |       |       |              |       |       |
| Glycerol         |              |       |      |              |       |      |              |       |       |              |       |       |              |       |       |              |       |       |
| Cytosol, nmol/g  |              |       |      |              |       |      |              |       |       |              |       |       |              |       |       |              |       |       |
| Mean             | 2.01         | 2.04  | 2.55 | 3.18         | 3.37  | 4.32 | 4.71         | 5.13  | 5.86  | 3.39         | 3.73  | 4.13  | 1.61         | 1.73  | 1.97  | 3.55         | 3.54  | 4.30  |
| SD               | 1.09         | 0.48  | 2.03 | 1.91         | 0.80  | 3.86 | 1.53         | 0.85  | 3.63  | 1.09         | 0.64  | 2.48  | 0.67         | 0.48  | 1.67  | 1.27         | 0.52  | 2.91  |
| Membrane, nmol/g |              |       |      |              |       |      |              |       |       |              |       |       |              |       |       |              |       |       |
| Mean             | 4.47         | 4.68  | 7.37 | 4.94         | 5.32  | 7.59 | 25.63        | 25.03 | 30.43 | 15.76        | 15.95 | 18.54 | 9.03         | 9.20  | 10.29 | 14.49        | 14.41 | 18.11 |
| SD               | 1.34         | 1.13  | 2.87 | 2.00         | 1.15  | 2.57 | 6.30         | 7.23  | 9.76  | 3.66         | 5.57  | 6.83  | 2.26         | 2.09  | 2.05  | 3.09         | 3.42  | 4.30  |
| Lipid            |              |       |      |              |       |      |              |       |       |              |       |       |              |       |       |              |       |       |
| Cytosol, nmol/g  |              |       |      |              |       |      |              |       |       |              |       |       |              |       |       |              |       |       |
| Mean             | 2.15         | 3.42  | 2.36 | 3.51         | 4.87  | 2.93 | 6.64         | 16.30 | 8.79  | 3.00         | 6.45  | 4.26  | 1.18         | 3.03  | 3.15  | 1.92         | 3.99  | 2.91  |
| SD               | 0.70         | 1.99  | 0.66 | 2.43         | 5.03  | 1.29 | 3.55         | 12.95 | 6.21  | 1.26         | 2.66  | 2.23  | 0.53         | 0.51  | 1.81  | 0.75         | 1.77  | 0.91  |
| Membrane, nmol/g |              |       |      |              |       |      |              |       |       |              |       |       |              |       |       |              |       |       |
| Mean             | 5.39         | 7.91  | 6.60 | 4.75         | 6.24  | 6.10 | 36.15        | 79.51 | 48.21 | 16.69        | 32.24 | 22.40 | 4.80         | 13.02 | 10.33 | 9.64         | 19.66 | 13.72 |
| SD               | 1.78         | 4.02  | 3.77 | 1.32         | 2.35  | 2.65 | 21.37        | 61.92 | 42.50 | 9.62         | 13.91 | 13.40 | 2.84         | 4.33  | 5.32  | 4.35         | 6.60  | 6.96  |
| <b>OBE</b>       |              |       |      |              |       |      |              |       |       |              |       |       |              |       |       |              |       |       |
| Cytosol, nmol/g  |              |       |      |              |       |      |              |       |       |              |       |       |              |       |       |              |       |       |
| Mean             | 3.11         |       |      | 6.66         |       |      | 9.97         |       |       | 7.08         |       |       | 3.33         |       |       | 4.86         |       |       |
| SD               | 0.97         |       |      | 3.88         |       |      | 4.85         |       |       | 4.50         |       |       | 1.97         |       |       | 1.84         |       |       |
| Membrane, nmol/g |              |       |      |              |       |      |              |       |       |              |       |       |              |       |       |              |       |       |
| Mean             | 6.04         |       |      | 7.93         |       |      | 28.45        |       |       | 17.32        |       |       | 10.13        |       |       | 16.38        |       |       |
| SD               | 1.01         |       |      | 2.57         |       |      | 11.20        |       |       | 7.78         |       |       | 5.34         |       |       | 5.64         |       |       |
| <b>T2D</b>       |              |       |      |              |       |      |              |       |       |              |       |       |              |       |       |              |       |       |
| Cytosol, nmol/g  |              |       |      |              |       |      |              |       |       |              |       |       |              |       |       |              |       |       |
| Mean             | 4.14         |       |      | 8.45         |       |      | 11.28        |       |       | 8.51         |       |       | 3.51         |       |       | 5.44         |       |       |
| SD               | 2.94         |       |      | 6.63         |       |      | 8.15         |       |       | 5.35         |       |       | 2.56         |       |       | 2.91         |       |       |
| Membrane, nmol/g |              |       |      |              |       |      |              |       |       |              |       |       |              |       |       |              |       |       |
| Mean             | 7.40         |       |      | 9.77         |       |      | 42.18        |       |       | 26.67        |       |       | 11.90        |       |       | 21.56        |       |       |
| SD               | 3.63         |       |      | 6.54         |       |      | 17.14        |       |       | 11.25        |       |       | 4.82         |       |       | 5.25         |       |       |

**Table S3. Myocellular DAG species correlate with PKC $\theta$  activation**

| DAG species  | Cytosolic fraction |          | Membrane fraction |          |
|--------------|--------------------|----------|-------------------|----------|
|              | <i>r</i>           | <i>P</i> | <i>r</i>          | <i>P</i> |
| C16:0, C20:4 | 0.521              | <0.005   | 0.447             | <0.05    |
| C18:0, C20:4 | 0.461              | <0.01    | 0.362             | <0.05    |
| C18:2, C18:0 | 0.581              | <0.005   | 0.428             | <0.05    |
| C18:1, C18:2 | 0.552              | <0.005   | 0.417             | <0.05    |
| C18:2, C18:2 | 0.591              | <0.005   | 0.532             | <0.005   |
| C16:0, C18:2 | 0.570              | <0.005   | 0.529             | <0.005   |

Pearson correlation coefficients (*r*) between myocellular DAG species and PKC $\theta$  activation across lean healthy humans (*n* = 11), young insulin-resistant obese humans (*n* = 10) and elderly obese humans with T2D (*n* = 10).

**Table S4. Anthropometric data of study participants**

|                                       | CON                     | OBE         | T2D         |
|---------------------------------------|-------------------------|-------------|-------------|
| <i>n</i> (male/female)                | 36 (24/12)              | 10 (5/5)    | 10 (5/5)    |
| Age, y                                | 28 ± 1                  | 29 ± 2      | 59 ± 3*     |
| Body mass index, kg/m <sup>2</sup>    | 22.4 ± 0.4 <sup>†</sup> | 41.4 ± 1.9  | 35.6 ± 1.2  |
| Fasting glucose, mg/dL                | 86 ± 3                  | 77 ± 3      | 131 ± 17*   |
| Fasting free FA, mmol/L               | 0.52 ± 0.13             | 0.50 ± 0.18 | 0.76 ± 0.15 |
| Fasting triglycerides, mg/dL          | 106 ± 13                | 137 ± 24    | 188 ± 20*   |
| Hemoglobin A <sub>1c</sub> , mmol/mol | 33 ± 0                  | 34 ± 1      | 54 ± 5*     |

Data are given as means ± SEM. FA, fatty acids.

\**P* < 0.05 vs. lean healthy controls (CON) and insulin resistant OBE.

<sup>†</sup>*P* < 0.05 vs. insulin resistant obese and patients with T2D.
